# Supplementary material
Source: ML conference proceedings conference paper supplement (https://openreview.net/forum?id=XrunSYwoLr)
Supplement: supplementary_material [file attachment]

Non-Linearity

ANN with **UGO**

SNN with **Spiking UGO**

$$y = f(x)$$

$$y = \hat{f}_{\text{RELU}}(x)$$

$$y_s = \hat{f}_{\text{IF}}(x_s)$$

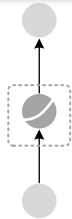

*$N$  neurons*

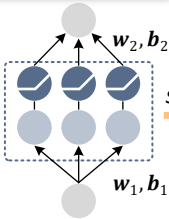

*$T$ -step simulation*

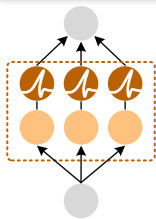

$x \in \mathcal{D}$   *$M$  samples*

$x_i \in \hat{\mathcal{D}}, i = 1, \dots, M$
