# Supplementary material
Source: ML conference proceedings conference paper supplement (https://openreview.net/forum?id=XrunSYwoLr)

$$\hat{f}_{\text{inv}}(\sum e^{x_j}) \approx \frac{1}{\sum e^{x_j}}$$

data clamping

$$\sum e^{x_j}$$

$$\frac{1}{\sum e^{x_j}}$$

$$e^x$$

scalar  
product

$$\hat{f}_{\text{exp}}(x_i) \approx e^{x_i}$$

data clamping

data offset

$$x$$

$$\frac{x}{\sum e^{x_j}}$$

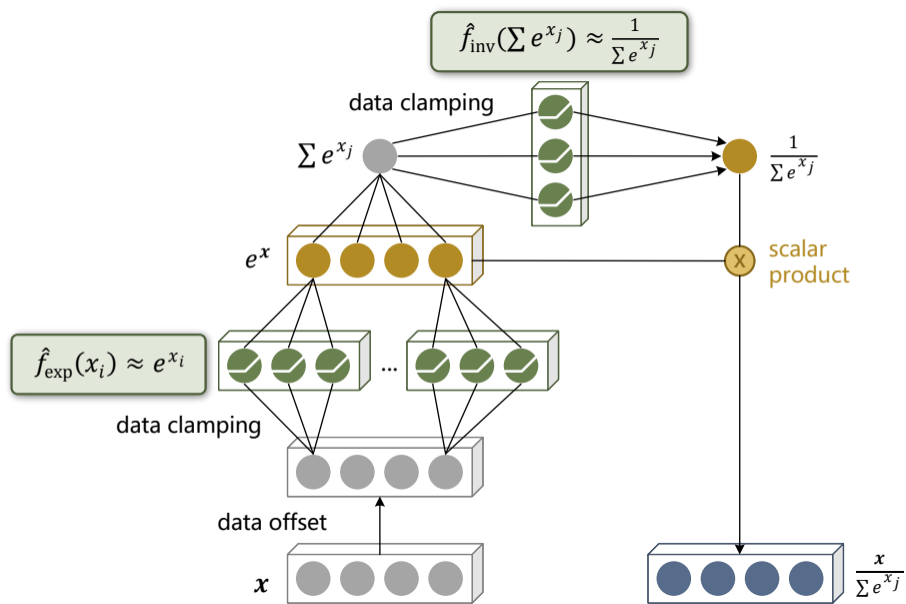

Supplement: supplementary_material [file attachment]
