# Supplementary material
Source: ML conference proceedings conference paper supplement (https://openreview.net/forum?id=XrunSYwoLr)

$$\hat{f}(\sigma^2) \approx 1/\sqrt{\sigma^2 + \epsilon}$$

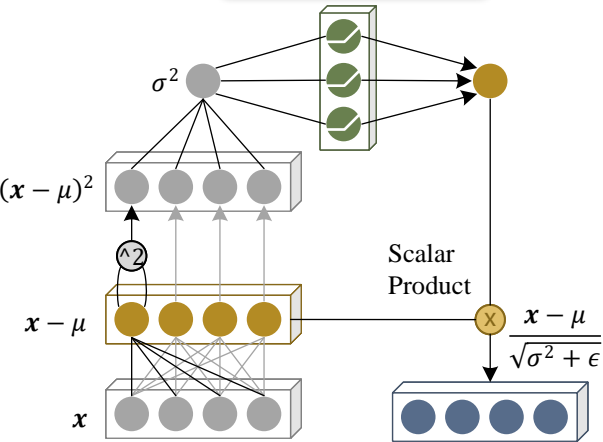

Supplement: supplementary_material [file attachment]

Unary Operator

Single Layer ANN

$T$ -step SNN

$$y = f(x)$$

$$y = \text{FC}_{\text{RELU}}(x)$$

$$y_s = \hat{f}_{\text{IF}}(x_s)$$

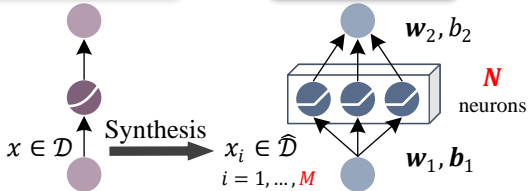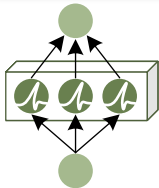

Supplement: supplementary_material [file attachment]

$$\hat{f}(\sigma^2) \approx 1/\sqrt{\sigma^2 + \epsilon}$$

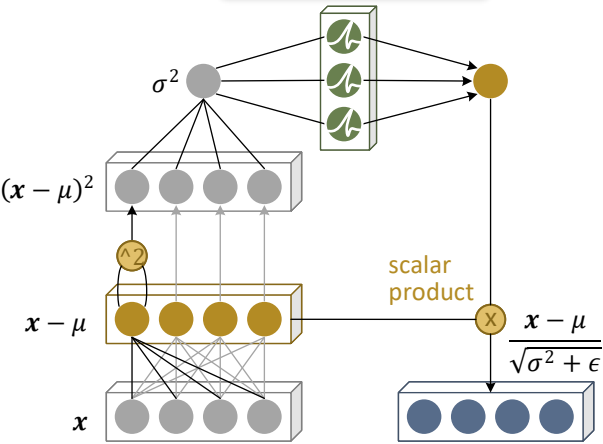

Supplement: supplementary_material [file attachment]

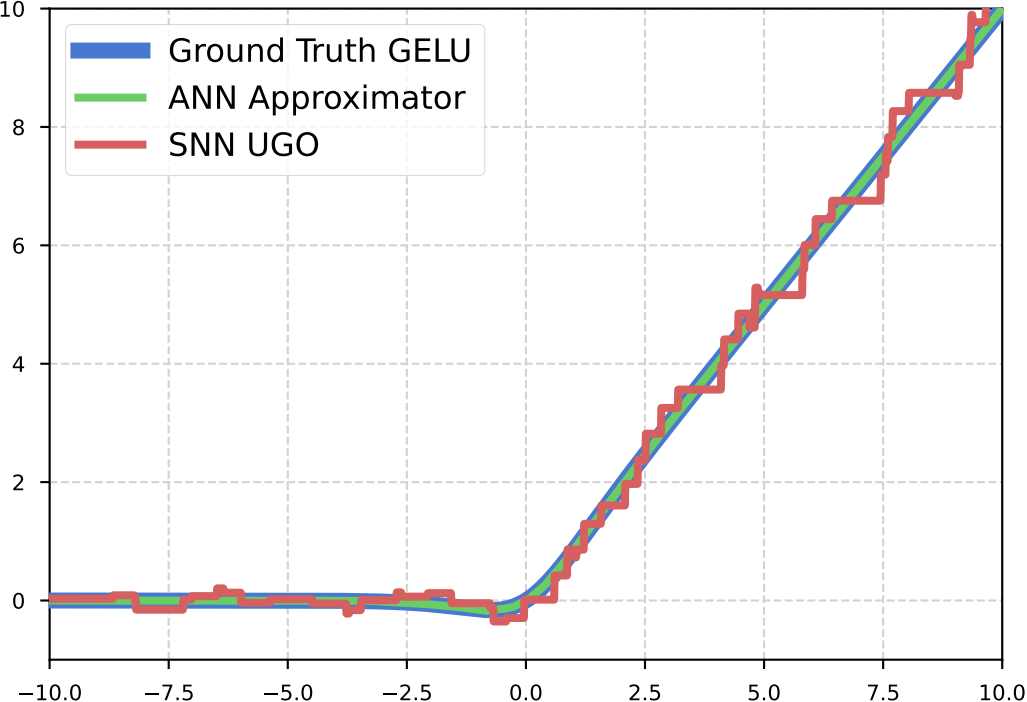

Supplement: supplementary_material [file attachment]

Exp

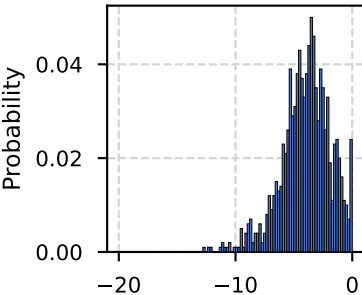

GELU

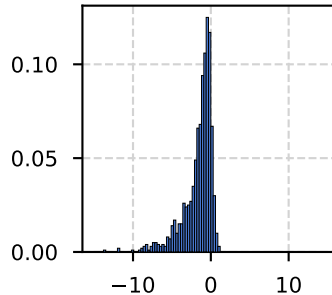

Inverse

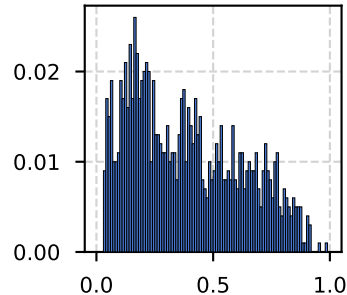

LayerNorm

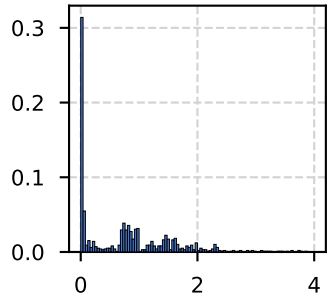

Supplement: supplementary_material [file attachment]

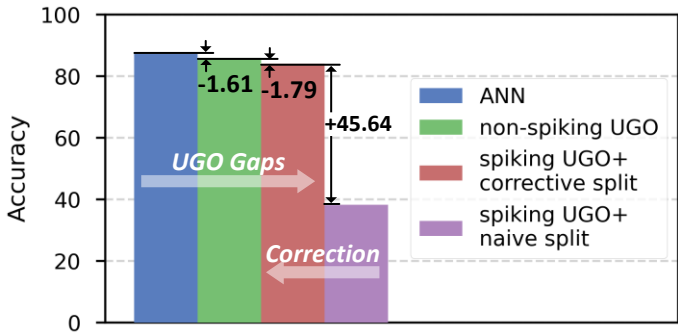

Supplement: supplementary_material [file attachment]

Exp

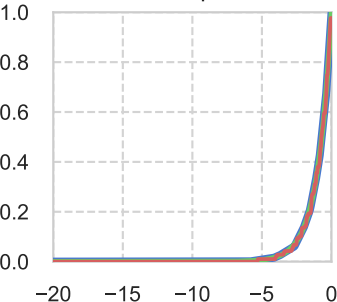

GELU

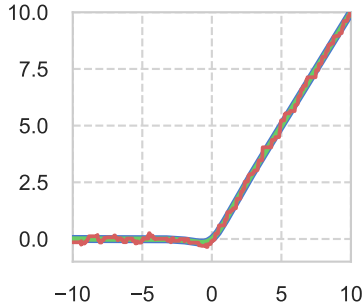

Inverse

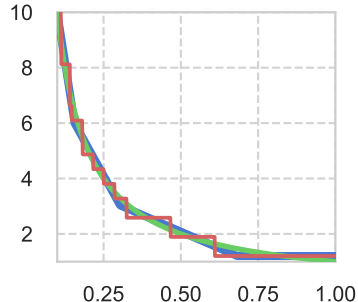

Sqrtinv

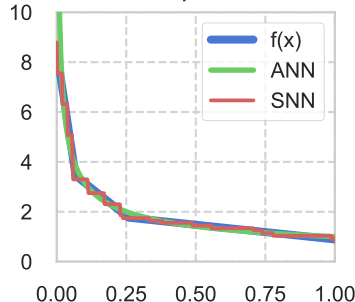

Supplement: supplementary_material [file attachment]

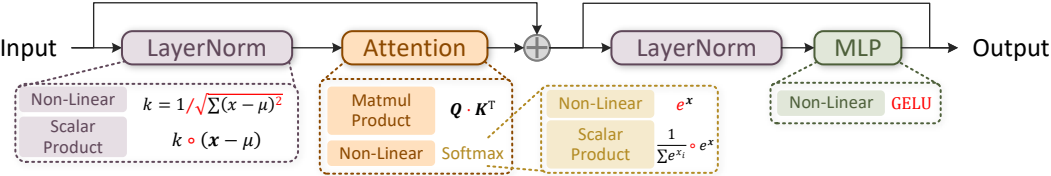

Supplement: supplementary_material [file attachment]

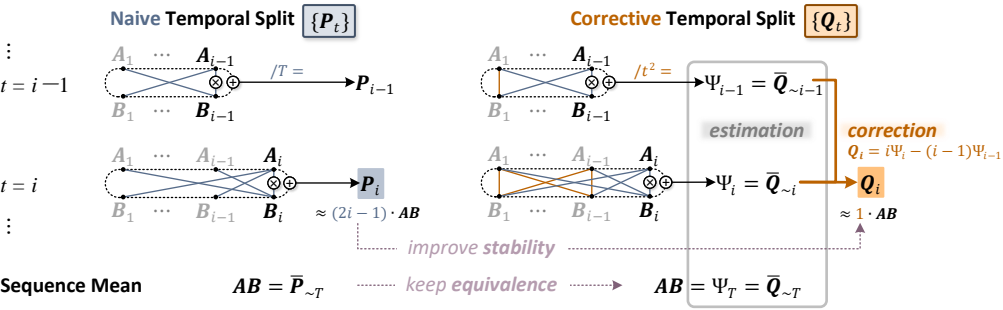

Supplement: supplementary_material [file attachment]

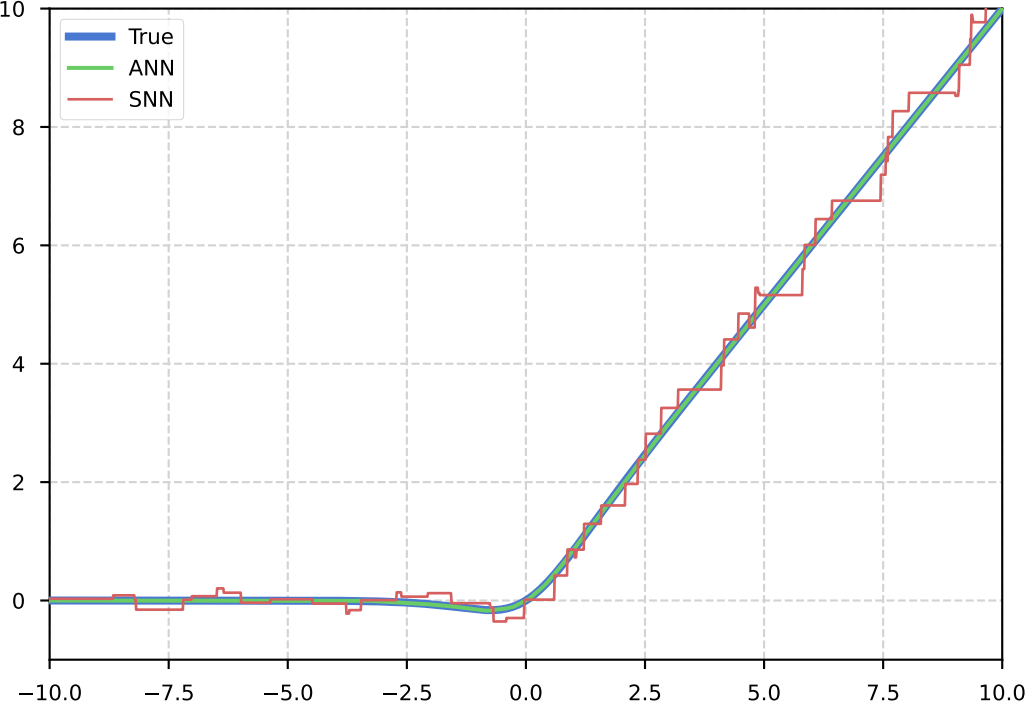

Supplement: supplementary_material [file attachment]
